# Supplementary material
Source: PubMed Central journal article supplement (PMC10548177)
Supplement: EMBJ-42-e113639-s014.pdf [file EMBJ-42-e113639-s014.pdf]

# WRKY transcription factors and OBERON histone-binding proteins form complexes to balance plant growth and stress tolerance

Ping Du, Qi Wang, Dan-Yang Yuan, Shan-Shan Chen, Yin-Na Su, Lin Li, She Chen, and Xin-Jian He  
**DOI: 10.15252/emboj.2023113639**

*Corresponding author(s): Xin-Jian He (hexinjian@nibs.ac.cn)*

---

## Review Timeline:

|                     |             |
|---------------------|-------------|
| Submission Date:    | 29th Jan 23 |
| Editorial Decision: | 3rd Mar 23  |
| Revision Received:  | 16th Jun 23 |
| Editorial Decision: | 5th Jul 23  |
| Revision Received:  | 10th Jul 23 |
| Accepted:           | 13th Jul 23 |

---

*Editor: William Teale*

## Transaction Report:

(Note: With the exception of the correction of typographical or spelling errors that could be a source of ambiguity, letters and reports are not edited. Depending on transfer agreements, referee reports obtained elsewhere may or may not be included in this compilation. Referee reports are anonymous unless the Referee chooses to sign their reports.)

Dear Dr. He,

Thank you again for the submission of your manuscript entitled "WRKY transcription factors and histone-binding proteins form complexes to balance plant growth and stress tolerance" (EMBOJ-2023-113639). We have now received three reports from the referees, which I copy below.

As you can see from their comments, all referees appreciated the significance of the interaction between OBE and WRKY proteins. However, all of them explicitly point out that the conclusions are somewhat preliminary and will require further experimental support before your manuscript can be published in The EMBO Journal. From my side, I would encourage to explore the influence the described interactions have under drought stress conditions more thoroughly.

Based on the overall interest expressed in the reports, I would like to invite you to address the comments of all referees in a revised version of the manuscript. I should add that it is The EMBO Journal policy to allow only a single major round of revision and that it is therefore important to resolve the main concerns at this stage. I believe the concerns of the referees are reasonable and addressable, but please contact me if you have any questions, need further input on the referee comments or if you anticipate any problems in addressing any of their points. Please, follow the instructions below when preparing your manuscript for resubmission.

I would also like to point out that as a matter of policy, competing manuscripts published during this period will not be taken into consideration in our assessment of the novelty presented by your study ("scooping" protection). We have extended this 'scooping protection policy' beyond the usual 3 month revision timeline to cover the period required for a full revision to address the essential experimental issues. Please contact me if you see a paper with related content published elsewhere to discuss the appropriate course of action.

When preparing your letter of response to the referees' comments, please bear in mind that this will form part of the Review Process File, and will therefore be available online to the community. For more details on our Transparent Editorial Process, please visit our website: <https://www.embopress.org/page/journal/14602075/authorguide#transparentprocess>

Again, please contact me at any time during revision if you need any help or have further questions.

Thank you very much again for the opportunity to consider your work for publication. I look forward to your revision.

Best regards,

William

-----  
William Teale, Ph.D.  
Editor  
The EMBO Journal

When submitting your revised manuscript, please carefully review the instructions below and include the following items:

- 1) a .docx formatted version of the manuscript text (including legends for main figures, EV figures and tables). Please make sure that the changes are highlighted to be clearly visible.
- 2) individual production quality figure files as .eps, .tif, .jpg (one file per figure).
- 3) a .docx formatted letter INCLUDING the reviewers' reports and your detailed point-by-point response to their comments. As part of the EMBO Press transparent editorial process, the point-by-point response is part of the Review Process File (RPF), which will be published alongside your paper.
- 4) a complete author checklist, which you can download from our author guidelines ([https://wol-prod-cdn.literatumonline.com/pb-assets/embo-site/Author Checklist%20-%20EMBO%20J-1561436015657.xlsx](https://wol-prod-cdn.literatumonline.com/pb-assets/embo-site/Author%20Checklist%20-%20EMBO%20J-1561436015657.xlsx)). Please insert information in the checklist that is also reflected in the manuscript. The completed author checklist will also be part of the RPF.
- 5) Please note that all corresponding authors are required to supply an ORCID ID for their name upon submission of a revised manuscript.
- 6) We require a 'Data Availability' section after the Materials and Methods. Before submitting your revision, primary datasets produced in this study need to be deposited in an appropriate public database, and the accession numbers and database listed

under 'Data Availability'. Please remember to provide a reviewer password if the datasets are not yet public (see <https://www.embopress.org/page/journal/14602075/authorguide#datadeposition>). If no data deposition in external databases is needed for this paper, please then state in this section: This study includes no data deposited in external repositories. Note that the Data Availability Section is restricted to new primary data that are part of this study.

Note - All links should resolve to a page where the data can be accessed.

7) When assembling figures, please refer to our figure preparation guideline in order to ensure proper formatting and readability in print as well as on screen:

<http://bit.ly/EMBOPressFigurePreparationGuideline>

Please remember: Digital image enhancement is acceptable practice, as long as it accurately represents the original data and conforms to community standards. If a figure has been subjected to significant electronic manipulation, this must be noted in the figure legend or in the 'Materials and Methods' section. The editors reserve the right to request original versions of figures and the original images that were used to assemble the figure.

8) For data quantification: please specify the name of the statistical test used to generate error bars and P values, the number (n) of independent experiments (specify technical or biological replicates) underlying each data point and the test used to calculate p-values in each figure legend. The figure legends should contain a basic description of n, P and the test applied. Graphs must include a description of the bars and the error bars (s.d., s.e.m.).

9) We would also encourage you to include the source data for figure panels that show essential data. Numerical data can be provided as individual .xls or .csv files (including a tab describing the data). For 'blots' or microscopy, uncropped images should be submitted (using a zip archive or a single pdf per main figure if multiple images need to be supplied for one panel). Additional information on source data and instruction on how to label the files are available at .

10) We replaced Supplementary Information with Expanded View (EV) Figures and Tables that are collapsible/expandable online (see examples in <https://www.embopress.org/doi/10.15252/embj.201695874>). A maximum of 5 EV Figures can be typeset. EV Figures should be cited as 'Figure EV1, Figure EV2" etc. in the text and their respective legends should be included in the main text after the legends of regular figures.

- For the figures that you do NOT wish to display as Expanded View figures, they should be bundled together with their legends in a single PDF file called \*Appendix\*, which should start with a short Table of Content. Appendix figures should be referred to in the main text as: "Appendix Figure S1, Appendix Figure S2" etc. See detailed instructions regarding expanded view here: .

- Additional Tables/Datasets should be labelled and referred to as Table EV1, Dataset EV1, etc. Legends have to be provided in a separate tab in case of .xls files. Alternatively, the legend can be supplied as a separate text file (README) and zipped together with the Table/Dataset file.

11) At EMBO Press we ask authors to provide source data for the main manuscript figures. Our source data coordinator will contact you to discuss which figure panels we would need source data for and will also provide you with helpful tips on how to upload and organize the files.

12) Our journal encourages inclusion of \*data citations in the reference list\* to directly cite datasets that were re-used and obtained from public databases. Data citations in the article text are distinct from normal bibliographical citations and should directly link to the database records from which the data can be accessed. In the main text, data citations are formatted as follows: "Data ref: Smith et al, 2001" or "Data ref: NCBI Sequence Read Archive PRJNA342805, 2017". In the Reference list, data citations must be labeled with "[DATASET]". A data reference must provide the database name, accession number/identifiers and a resolvable link to the landing page from which the data can be accessed at the end of the reference. Further instructions are available at .

Additional instructions for preparing your revised manuscript:

Please make sure you upload a letter of response to the referees' comments together with the revised manuscript.

Please also check that the title and abstract of the manuscript are brief, yet explicit, even to non-specialists.

When assembling figures, please refer to our figure preparation guideline in order to ensure proper formatting and readability in print as well as on screen:

<https://bit.ly/EMBOPressFigurePreparationGuideline>

See also guidelines for figure legends: <https://www.embopress.org/page/journal/14602075/authorguide#figureformat>

At EMBO Press we ask authors to provide source data for the main manuscript figures. Our source data coordinator will contact you to discuss which figure panels we would need source data for and will also provide you with helpful tips on how to upload

and organize the files.

**IMPORTANT:** When you send the revision we will require

- a point-by-point response to the referees' comments, with a detailed description of the changes made (as a word file).
- a word file of the manuscript text.
- individual production quality figure files (one file per figure)
- a complete author checklist, which you can download from our author guidelines (<https://www.embopress.org/page/journal/14602075/authorguide>).
- Expanded View files (replacing Supplementary Information)

Please see out instructions to authors

<https://www.embopress.org/page/journal/14602075/authorguide#expandedview>

Please remember: Digital image enhancement is acceptable practice, as long as it accurately represents the original data and conforms to community standards. If a figure has been subjected to significant electronic manipulation, this must be noted in the figure legend or in the 'Materials and Methods' section. The editors reserve the right to request original versions of figures and the original images that were used to assemble the figure.

Further information is available in our Guide For Authors: <https://www.embopress.org/page/journal/14602075/authorguide>

We realize that it is difficult to revise to a specific deadline. In the interest of protecting the conceptual advance provided by the work, we recommend a revision within 3 months (1st Jun 2023). Please discuss the revision progress ahead of this time with the editor if you require more time to complete the revisions. Use the link below to submit your revision:

<https://emboj.msubmit.net/cgi-bin/main.plex>

-----  
Referee #1:

The manuscript from Du and collaborators investigates the interaction between WRKY transcription factors and histone binding proteins OBEs and its relevance in plant growth.

The work is interesting with lots of different datasets however it doesn't fully clarify the role of this interaction in plants.

More in details:

Figure 1B: this experiment gives a hint on the stabilisation of the WRKY-OBE protein complexes, however to be sure that the lower protein levels are not due to the transgene insertion, it could be important that to assess that such reduction the WRKY does not occur in another mutant.

Figure 1C: The structure between WRKYS in different plant kingdom might diverge therefore talking about evolution might be premature. In addition, to further prove this interaction Co-IP in planta is required. The in vitro pull down is important to define an interaction but it doesn't take in account the putative competition between other wrkys and obes.

Figure 2C: The pulldown experiment is not clear at all.

First of all there are any bands being pulled down, even the GST on its own which shouldn't really be the case. Arrows are required to indicate the expected molecular weight, as well as a negative control with a protein that does not show interaction, rather than just GST on its own.

Figure 3: I appreciate the authors work in generating sextuple mutants, but perhaps, for the relevance of this manuscript, it would be worth to show the phenotype of double or triple mutant between obes and wrkys, especially if the proteins directly interact.

The authors also compared wrkys with obe mutants in terms of fresh weight as well as plant height. However for the flowering they only used the wrkys. If the interaction is important also for reproductive stages obe mutants should also been analysed.

Heatmaps should also show the expression patterns in the wild type not just between mutants.

Figure 4: ChIPseq experiment: OBE proteins possess a PHD domain that is required to bind methylated histone tails, therefore do not bind directly DNA. To corroborate that is through WRKY11 I suggest to check some of the OBE1 binding in the quintuple mutant.

Figure 8: The drought experiment needs could also be performed in the obe/wrky double mutants as looking at different obes and wrkys does not give more insights on the interaction. the expression of DREBs should also be measured in control conditions as they already see a change based on the RNAseq data.

It might also be interesting to assess the methylation levels in wrkys and obes mutants

Referee #2:

In this study, the authors found that the group IId WRKY transcription factors interact with histone-binding OBE proteins and form WRKY-OBE complexes in *Arabidopsis thaliana*. The coiled-coil motif of WRKY transcription factors is responsible for the binding

to OBE proteins and transcriptional repression. In addition, the PHD finger of OBE proteins is responsible for the binding to the histone proteins and interacting with WRRY transcription factors. WRKY-OBE complexes repress the transcription of stress-responsive genes and are required for maintaining normal plant growth. It was suggested that the WRKY-OBE complexes repress the transcription of stress-responsive genes under non-stress conditions. This study provides insight into the mechanism underlying the regulation of the function and activity of WRKY transcription factors in plant growth and stress responses. The experiment in this study was carefully designed and the results were well documented. I have the following suggestions.

Major points:

1. The authors showed that group IId WRKY transcription factors interact with OBE proteins and form WRKY-OBE complexes. Furthermore, the PHD finger of OBE proteins bind to histones. However, it is unclear how WRKY-OBE interaction is involved in gene repression. The authors may want to check the histone modification changes of WRKY and OBE targeted genes to analyze whether WRKYs and OBEs regulate gene expression through histone modifications.
2. By EMSA, the authors showed that the binding of OBE1 to DNA containing W-boxes is dependent on WRKY11 in vitro (Fig. 5D-5F). It is important to show whether the binding of OBE1 or WRKY11 to target genes is also dependent on WRKYs or OBEs in vivo, since in vitro and in vivo data could be different. I suggest that the authors can also carry out ChIP-qPCR assays to analyze whether the binding of OBE1 or WRKY11 in vivo using wrky or obe- mutants.

Minor points:

1. The authors identified the OBE-interacting domain (OID) that is important for the interaction between the group IId WRKY proteins and OBE proteins and for the selection of WRKY domain-binding loci. I am wondering whether the OID domain can also be found in other groups of WRKY proteins.
2. Page 4, line 141: "To identify the proteins that interact with group IId WRKY transcription factors, we performed affinity purification followed by mass spectrometry (AP-MS) using WRKY7-Flag and WRKY11-Flag transgenic plants that express native promoter-driven transgenes."

Please indicate why WRKY7 and WRKY11 were selected in this study.

3. Page 5, line 155: "By introducing the WRKY11-Flag transgene into the obe1/2 mutant and wild-type backgrounds, we found that, although the transcript level of WRKY11-Flag was similar between the obe1/2 mutant and the wild type, the protein level of WRKY11-Flag was markedly reduced in the obe1/2 mutant (Figure 1B)".

I cannot find the data showing the transcript level of WRKY11-Flag. Please also indicate which promoter was used to drive the WRKY11-Flag transgene.

4. Page 5, line 178: "and the results indicated that the tested WRKY transcription factors interact with OBE1-4 but not with each other (Figure 2A, 2B, and Supplemental Figure 5)".

Please explain why the group IId WRKY transcription factors were co-purified with WRKY7 and WRKY11 in AP-MS, but they did not interact with each other in yeast two-hybrid assays.

5. Fig. 2a

The authors may want to use different colors to mark OID, WRKY, PHD and coiled-coil domains.

6. Fig. 3

Fig. 3A-3B have wrky-qm/15+/-, but lack wrky-qm. However, Fig. 3C-3F have wrky-qm, but lack wrky-qm/15+/- . I suggest that the authors also add wrky-qm to Fig. 3A-3B and wrky-qm/15+/- to Fig. 3C-3F.

7. It has been reported that some WRKY proteins regulate gene expression through histone modifications (eg., Plant Physiol. 190: 532-547.). The authors need to cite these references and discuss the possibility whether the group IId WRKY proteins can affect gene expression through histone modifications.

Referee #3:

In this manuscript by Du et al., the authors report that subgroup IId WRKY transcription factors form a complex with OBEs and regulate the expression of stress-responsive genes. The authors provide strong evidence that OBEs interact with WRKYs

through the N-terminal coiled-coil domains, and the interaction is essential for WRKY-mediated transcriptional repression. The authors also show that binding OBEs on the H3K4me2/3 is required for the target selection of WRKYs. In addition, the *obe* and *wrky* high-order mutants show very similar and dramatic phenotypes in both retarded growth and drought tolerance. Thus, the manuscript uncovers a highly conserved transcription factor/histone-binding protein complex that might be essential for regulating stress-responsive genes. In my opinion, this manuscript could be published on EMBO J, after addressing a few issues.

#### Major issues:

1. In Figure 3J, it is interesting that the stress-responsive TF and marker gene, DREB1s and RD29A, are only highly expressed in *wrky-qm* but not in *obe1/2* or *qm/15+/-*. However, Figure 8 shows that DREB1s are highly expressed in both *wrky-qm* and *obe1/3*. What is the reason for this inconsistency? Why did the authors use *obe1/3* in RNA-seq and another allele, *obe1/2*, in phenotypic and qRT-PCR assays? It appears that different *obe* double mutants have different expressions of stress-responsive genes.
2. In Figures 6 and 7, the authors show strong evidence that OBE-mediated H3K4me2/3 activity is essential for the target selection of WRKY11. It would be more convincing if the authors also compared the H3K4me2/3 regions (perhaps from published results), WRKY11 target sites, and OEB1 binding sites at the genomic level. This data could further support the proposed model.
3. In Figure 8, the authors compare the drought survival phenotype of different *wrky* and *obe* mutants. As mentioned above, the *obe* double mutant used in this figure is inconsistent with the one used in RNA-seq. Please also include *obe1/2* in the phenotypic and q-PCR assays. In addition, the drought-tolerant phenotype of *obe1/3* and *wrky-qm* is impressive, and please also perform the water loss assay to strengthen this piece of data.
4. The authors show two biological processes: 1) most OBEs and IId WRKYs show less expression in drought-treated plants, and OBEs/WRKYs can bind to the promoters of stress-induced genes (DREB1s), 2) stress-responsive genes are up-regulated in drought-treated plants, and then propose a model that OBE-WRKY complex balances plant growth and stress tolerance. However, it is not conclusive whether the expression of stress-responsive genes depends on the OBE-WRKY complex. I suggest an additional experiment to dissect this notion. The authors could perform a time-course (for example, 0, 3h, 6h, 12h, 24h, 48h) q-PCR assay of OBE, WRKY, DREB1, and RD29B, to see the time-dependent correlation between the decrease of OBE/WRKY expression and the increase of stress-responsive genes, which might further support the model.

#### Minor issues:

#### Minor issues:

1. In the last paragraph of the Introduction, the authors wrote, "the conserved N-terminal motif of the group IId WRKY proteins, which was previously thought to interact with calmodulin based on in vitro assays (Park et al., 2005), is responsible for interacting with the histone-binding OBE proteins but not with calmodulin in Arabidopsis plants". However, as no data showed that it does not interact with the calmodulin in this manuscript, the authors cannot exclude the possibility that this motif also interacts with calmodulin. Please modify.  
In addition, the authors gave a new name, OID, to this motif. However, besides interacting with OBEs, this motif is also essential for WRKY-WRKY interaction (this study) and might interact with other proteins like calmodulin. I suggested the authors keep the coiled-coil domain rather than give a new name to it.
2. Though the authors showed that OBEs interact with IId subgroup WRKYs, it is unclear whether the OBEs also interact with WRKYs in other subgroups. This data would help us understand the specificity of this OBE-WRKY complex.
3. Figure 7E, the authors should also test the combination of OBE1+WRKY11, and OEB1+WRKY11-OIDA.

Referee #1:

The manuscript from Du and collaborators investigates the interaction between WRKY transcription factors and histone binding proteins OBEs and its relevance in plant growth.

The work is interesting with lots of different datasets however it doesn't fully clarify the role of this interaction in plants.

Response: Thanks very much for the positive and constructive comments. All the concerns have been point-by-point addressed in the revised manuscript.

More in details:

Figure 1B: this experiment gives a hint on the stabilisation of the WRKY-OBE protein complexes, however to be sure that the lower protein levels are not due to the transgene insertion, it could be important that to assess that such reduction the WRKY does not occur in another mutant.

Response: Due to the severe developmental defects of *obe1/2* double mutant, we initially transformed the *WRKY11-Flag* transgene into *obe1+/-;obe2-/-* mutant plants without clear developmental defects and subsequently identified *WRKY11-Flag* transgenic plants with the *obe1/2* double mutant background in the progeny of self-bred *WRKY11-Flag* transgenic plants. To be sure that the lower *WRKY11-Flag* protein level was not due to the transgene insertion, we identified *WRKY11-Flag* transgenic plants with both the *obe1/2* double mutant and *obe2* single mutant backgrounds in the progeny of self-bred *WRKY11-Flag* transgenic plants. As expected, although the transcript level of *WRKY11-Flag* was similar between the *obe1/2* double mutant and the *obe2* single mutant, the protein level of *WRKY11-Flag* was markedly reduced in the *obe1/2* double mutant relative to the *obe1* single mutant (Figure 1B), suggesting that the reduced protein level of *WRKY11-Flag* is due to the loss of OBE1 and OBE2 in Arabidopsis plants.

Figure 1C: The structure between WRKYS in different plant kingdom might diverge therefore talking about evolution might be premature. In addition, to further prove this interaction Co-IP in planta is required. The in vitro pull down is important to define an interaction but it doesn't take in account the putative competition between other wrkys and obes.

Response: As suggested, we tuned down the statement related to the evolution of WRKY-OBE interaction. We agree with you that the specificity of WRKY-OBE interactions needs to be validated in other plants. Therefore, we performed a pull down assay to determine whether the purified WRKY IId transcription factor OsWRKY51 specifically interacts with OBE proteins in the total protein extract of rice seedlings. The pull down assay indicated that the OBE proteins OsOBE1 and OsOBE2 were co-purified with OsWRKY51, supporting the idea that the WRKY IId transcription factors also form a WRKY-OBE complex in other plants (Dataset EV1).

Figure 2C: The pulldown experiment is not clear at all.

First of all there are any bands being pulled down, even the GST on its own which shouldn't really be the case. Arrows are required to indicate the expected molecular weight, as well as a negative control with a protein that does not show interaction, rather than just GST on its own.

Response: To confirm the pull-down result, we performed additional pull down assays using the MBP protein as a negative control. As shown in Figure 2C, a series of GST tagged proteins cannot interact with MBP protein, while the MBP tagged WRKY11-1 protein can interact with full-length OBE1, OBE1-2 and OBE1-3; the MBP tagged OBE2-4 protein can interact with full-length of OBE1 and OBE1-3, which is consistent with the previous result (Appendix Fig S7).

Figure 3: I appreciate the authors work in generating sextuple mutants, but perhaps, for the relevance of this manuscript, it would be worth to show the phenotype of double or triple mutant between *obes* and *wrkys*, especially if the proteins directly interact.

Response: As suggested, we generated the *obe1/3/wrky15* and *obe1/3/wrky21* triple mutants by CRISPR-mediated mutagenesis of *WRKY15* and *WRKY21* in the *obe1/3* double mutant background. Phenotypical analysis indicated that the triple mutants show similar phenotype with the *obe1/3* double mutant (Appendix Fig S12), supporting the concept that the WRKY and OBE proteins function in the same protein complex.



The authors also compared *wrkys* with *obe* mutants in terms of fresh weight as well as plant height. However for the flowering they only used the *wrkys*. If the interaction is important also for reproductive stages *obe* mutants should also be analysed.

Response: As suggested, we analyzed the flowering-time phenotype in *obe1*, *obe2*, *obe3* and *obe4* single mutants and in *obe1/3* and *obe1/4* double mutants, and found that the *obe3* single mutant and the *obe1/3* double mutant exhibited a significant late-flowering phenotype (Appendix Fig S11), suggesting that the flowering-time phenotype is co-regulated by both the WRKY and OBE components in the WRKY-OBE complex.

Heatmaps should also show the expression patterns in the wild type not just between mutants.

Response: In Figure 3H, the heatmaps showed the expression changes in indicated mutants relative to the wild type, and the color bar scale referred to  $\log_2$ (fold change of RPKM between mutants and wild type). The heatmaps clearly showed that the expression levels of numerous genes are co-regulated in the *obe* and *wrky* mutants (Figure 3H). As suggested, we showed our RNA-seq data by box plots in both the mutants and the wild type (Appendix Fig S14), further confirming that gene expression is co-regulated in the *obe* and *wrky* mutants relative to the wild type. Moreover, Dataset EV2 indicated the RPKM of RNA-seq data for differently expressed genes in both the mutants and the wild type.

Figure 4: ChIPseq experiment: OBE proteins possess a PHD domain that is required to bind methylated histone tails, therefore do not bind directly DNA. To corroborate that is through WRKY11 I suggest to check some of the OBE1 binding in the quintuple mutant.

Response: As suggested, we performed ChIP-PCR for OBE1-Flag in the wild type and *wrky-qm* mutant backgrounds to determine the effect of *wrky-qm* on the association of OBE1 with chromatin. The result indicated that the association of OBE1 with target genes was significantly reduced in the *wrky-qm* mutant relative to the wild type (Figure 5G, 5H), suggesting that the association of OBE1 with target genes depends on the DNA binding ability of WRKYs.

Figure 8: The drought experiment needs could also be performed in the *obe/wrky* double mutants as looking at different *obes* and *wrkys* does not give more insights on the interaction. The expression of DREBs should also be measured in control conditions as they already see a change based on the RNAseq data.

Response: As suggested, we created the *obe1/3/wrky15* and *obe1/3/wrky21* triple mutants by CRISPR-mediated mutagenesis of *WRKY15* and *WRRKY21* in the *obe1/3* double mutant background and found that the triple mutants showed similar morphological phenotypes to the *obe1/3* double mutant (Appendix Fig S12). This genetic analysis supports the notion that the WRKY and OBE proteins function in the same protein complex. The similar morphological phenotypes observed in the *obe1/3* double mutant and the *obe1/3/wrky15* or *obe1/3/wrky21* triple mutants (Appendix Fig S12) suggest that the triple mutants may also exhibit a comparable drought tolerance phenotype to the *obe1/3* double mutant. Our RNA-seq data indicated that the expression levels of most *WRKY* *Ild* and *OBE* genes were significantly reduced by the drought treatment (Figure 8F). As suggested, we also showed the expression levels of *DREBs* under both control and drought conditions (Figure 8F), indicating that the expression levels of *DREB1A/1B/1C* were substantially induced by the drought treatment.

It might also be interesting to assess the methylation levels in *wrkys* and *obes* mutants.

Response: As suggested, we assessed the histone H3K4me2, H3K4me3 and H3K27me3 levels in the wild type and *obe1/2*, *wrky-qm/15<sup>+/-</sup>* and *wrky-qm* mutants by immunoblotting, and found that the H3K4me2, H3K4me3 and H3K27me3 levels were not affected at the whole-genome level (Appendix Fig S17C). Given that the PHD domain of OBE1 is capable of binding to H3K4me3, we determined whether the WRKY-OBE complex tends to occupy H3K4me3-enriched genes. By analyzing previous H3K4me3 and H3K27me3 ChIP-seq data (Shang et al., 2021; Zhao et al., 2022), we found that the H3K4me3 levels are significantly higher in WRKY11- and OBE1-occupied genes than in random genes, while the H3K27me3 levels are significantly lower in WRKY11- and OBE1-occupied genes than in random genes (Appendix Fig S17A), supporting

the inference that the binding of OBE1 to H3K4me3 is involved in the association of the WRKY-OBE complex with chromatin.

Referee #2:

In this study, the authors found that the group IId WRKY transcription factors interact with histone-binding OBE proteins and form WRKY-OBE complexes in *Arabidopsis thaliana*. The coiled-coil motif of WRKY transcription factors is responsible for the binding to OBE proteins and transcriptional repression. In addition, the PHD finger of OBE proteins is responsible for the binding to the histone proteins and interacting with WRKY transcription factors. WRKY-OBE complexes repress the transcription of stress-responsive genes and are required for maintaining normal plant growth. It was suggested that the WRKY-OBE complexes repress the transcription of stress-responsive genes under non-stress conditions. This study provides insight into the mechanism underlying the regulation of the function and activity of WRKY transcription factors in plant growth and stress responses. The experiment in this study was carefully designed and the results were well documented. I have the following suggestions.

Response: Thanks for the positive and constructive comments. All the concerns have been point-by-point addressed in the revised manuscript.

Major points:

1. The authors showed that group IId WRKY transcription factors interact with OBE proteins and form WRKY-OBE complexes. Furthermore, the PHD finger of OBE proteins bind to histones. However, it is unclear how WRKY-OBE interaction is involved gene repression. The authors may want to check the histone modification changes of WRKY and OBE targeted genes to analyze whether WRKYs and OBEs regulate gene expression through histone modifications.

Response: Since we did not identify that the WRKY-OBE complex interacts with any histone modifiers, we have no evidences for supporting the notion that the WRKY-OBE complex is involved in catalyzing histone modifications. By immunoblotting, we found that the H3K4me3 and H3K27me3 levels were not significantly affected in the *wrky-qm*, *wrky-qm/15<sup>+/-</sup>*, or *obe1/2*

mutants relative to the wild type (Appendix Fig S17C). To determine how the WRKY-OBE interaction is involved in transcriptional repression, we performed a complementation test to investigate whether the deletion of the coiled-coil domain in WRKY11 affects its function in Arabidopsis plants and found that the deletion disrupts the WRKY-mediated transcriptional repression at WRKY target genes in Arabidopsis plants (Figure 7F-7I). Furthermore, by performing additional reporter assays in Arabidopsis protoplasts, we found that OBE1 substantially enhances the WRKY11-mediated transcriptional repression of the luciferase reporter gene, and that the deletion of the coiled-coil domain in WRKY11 disrupts the effect of OBE1 on the WRKY11-mediated transcription repression (Figure 7E). These analyses strongly suggest that the WRKY-OBE interaction is involved in WRKY-mediated transcriptional repression. By analyzing previous H3K4me3 ChIP-seq data (Shang et al., 2021), we found that both WRKY11 and OBE1 target genes are enriched with H3K4me3 in Arabidopsis plants (Appendix Fig S17A-B), which is consistent with the finding that OBE1 is capable of binding to H3K4me3 as determined by *in vitro* binding assays (Figure 7A-C).

2. By EMSA, the authors showed that the binding of OBE1 to DNA containing W-boxes is dependent on WRKY11 *in vitro* (Fig. 5D-5F). It is important to show whether the binding of OBE1 or WRKY11 to target genes is also dependent on WRKYs or OBEs *in vivo*, since *in vitro* and *in vivo* data could be different. I suggest that the authors can also carry out CHIP-qPCR assays to analyze whether the binding of OBE1 or WRKY11 *in vivo* using *wrky* or *obe*- mutants.

Response: As suggested, we performed ChIP-PCR for OBE1-Flag in the wild-type and *wrky-qm* mutant backgrounds to determine whether WRKYs are involved in the binding of OBE1 to its target genes *in vivo*. As shown in Figure 5G and 5H, the binding of OBE1 to its target genes was substantially reduced in the *wrky-qm* mutant compared to the wild type. These results support the notion that the binding of OBE1 to its target genes is dependent on WRKYs *in vitro* and *in vivo*. Considering that the protein level was markedly reduced in the *obe1/2* mutant compared to the wild type (Figure 1B), the OBE proteins are likely required for maintenance of the WRKY protein stability. Therefore, it is not possible to obtain WRKY11-Flag transgenic plants with a comparable protein level of *WRKY11-Flag* between the *obe1/2* and wild-type backgrounds for ChIP-PCR

analysis.

Minor points:

1. The authors identified the OBE-interacting domain (OID) that is important for the interaction between the group IId WRKY proteins and OBE proteins and for the selection of WRKY domain-binding loci. I am wondering whether the OID domain can also be found in other groups of WRKY proteins.

Response: The OID domain (which was named coiled-coil domain in the revised version) was conserved in the group IId WRKY proteins and cannot be found in other groups of WRKY proteins. We clearly indicated the statement in the revised manuscript.

2. Page 4, line 141: "To identify the proteins that interact with group IId WRKY transcription factors, we performed affinity purification followed by mass spectrometry (AP-MS) using WRKY7-Flag and WRKY11-Flag transgenic plants that express native promoter-driven transgenes". Please indicate why WRKY7 and WRKY11 were selected in this study.

Response: Within the members of group IId WRKY transcription factors, WRKY7 and WRKY11 belong to different subgroups (Appendix Fig S2). Therefore, WRKY7 and WRKY11 were selected as representatives of group IId WRKY transcription factors. We indicated the statement in the revised manuscript.

3. Page 5, line 155: "By introducing the WRKY11-Flag transgene into the *obe1/2* mutant and wild-type backgrounds, we found that, although the transcript level of WRKY11-Flag was similar between the *obe1/2* mutant and the wild type, the protein level of WRKY11-Flag was markedly reduced in the *obe1/2* mutant (Figure 1B)". I cannot find the data showing the transcript level of WRKY11-Flag. Please also indicate which promoter was used to drive the WRKY11-Flag transgene.

Response: The bar chart shown in Figure 1B showed the transcript levels of *WRKY11-Flag* in the

*obe1/2* mutant and wild-type backgrounds (Figure 1B). To avoid misunderstanding, we clearly labelled it in the revised Figure.

4. Page 5, line 178: "and the results indicated that the tested WRKY transcription factors interact with OBE1-4 but not with each other (Figure 2A, 2B, and Supplemental Figure 5)". Please explain why the group IId WRKY transcription factors were co-purified with WRKY7 and WRKY11 in AP-MS, but they did not interact with each other in yeast two-hybrid assays.

Response: Although the group IId WRKY transcription factors did not interact with each other in yeast two-hybrid assays, In the WRKY-OBE complex, two copies of OBE proteins directly interact to form a dimer, and the OBE dimer functions as a bridge connecting two copies of WRKY proteins, thus revealing a previously uncharacterized mechanism underlying the dimerization of WRKY proteins.

5. Fig. 2a

The authors may want to use different color to mark OID, WRKY, PHD and coiled-coil domains.

Response: As suggested, we used different colors to mark conserved domains of WRKY and OBE proteins in Figure 2A and 2F.

6. Fig. 3

Fig. 3A-3B have *wrky-qm/15<sup>+/-</sup>*, but lack *wrky-qm*. However, Fig. 3C-3F have *wrky-qm*, but lack *wrky-qm/15<sup>+/-</sup>*. I suggest that the authors also add *wrky-qm* to Fig. 3A-3B and *wrky-qm/15<sup>+/-</sup>* to Fig. 3C-3F.

Response: As suggested, we added *wrky-qm* to the revised Fig. 3A-3B. The morphological phenotypes of adult plants were shown in Fig. 3C-3F. Due to severe developmental defects of *wrky-qm/15<sup>+/-</sup>*, *obe1/2* and *obe3/4* mutants, the adult plants of these mutants were not available.

7. It has been reported that some WRKY proteins regulate gene expression through histone

modifications (eg., Plant Physiol. 190: 532-547.). The authors need to cite these references and discuss the possibility whether the group IId WRKY proteins can affect gene expression through histone modifications.

Response: As suggested, we cited two references (Kim et al., 2008; Hung et al., 2022) and showed the possibility that WRKY transcription factors can affect transcription through histone modifications in the discussion part.

Referee #3:

In this manuscript by Du et al., the authors report that subgroup IId WRKY transcription factors form a complex with OBEs and regulate the expression of stress-responsive genes. The authors provide strong evidence that OBEs interact with WRKYs through the N-terminal coiled-coil domains, and the interaction is essential for WRKY-mediated transcriptional repression. The authors also show that binding OBEs on the H3K4me2/3 is required for the target selection of WRKYs. In addition, the obe and wrky high-order mutants show very similar and dramatic phenotypes in both retarded growth and drought tolerance. Thus, the manuscript uncovers a highly conserved transcription factor/histone-binding protein complex that might be essential for regulating stress-responsive genes. In my opinion, this manuscript could be published on EMBO J, after addressing a few issues.

Response: Thanks for the positive and constructive comments. All the concerns have been point-by-point addressed in the revised manuscript.

Major issues:

1. In Figure 3J, it is interesting that the stress-responsive TF and marker gene, DREB1s and RD29A, are only highly expressed in wrky-qm but not in obe1/2 or qm/15+/. However, Figure 8 shows that DREB1s are highly expressed in both wrky-qm and obe1/3. What is the reason for this inconsistency? Why did the authors use obe1/3 in RNA-seq and another allele, obe1/2, in phenotypic and qRT-PCR assays? It appears that different obe double mutants have different expressions of stress-responsive genes.

Response: As suggested, we used *obe1/3* in phenotypic and qRT-PCR analyses (Figure 8A-D; Appendix Fig S11). Our RNA-seq analysis identified numerous upregulated DEGs (including *DREBs*) in *wrky-qm* that were not upregulated in *obe1/2* or *wrky-qm/15<sup>+/-</sup>* mutants (Figure 3G). We predicted that the upregulated DEGs identified in *wrky-qm* were exclusively expressed in well-developed roots and leaves, and that the failure in identifying these upregulated DEGs in *obe1/2* and *wrky-qm/15<sup>+/-</sup>* is caused by the absence of well-developed roots and leaves in these mutants. Supporting the prediction, the expression levels of *DREB1s* were upregulated in the *wrky-qm* and *obe1/3* mutants with weak developmental defects but not in the *wrky-qm/15<sup>+/-</sup>* and *obe1/2* mutants with serious developmental defects (Figure 3G and Figure 8D). In the OBE protein family, OBE1 and OBE2 belong to one subfamily and OBE3 and OBE4 belong to another subfamily. It is possible that the OBE proteins within the same subfamily are more redundant than the OBE proteins from different subfamilies. Therefore, it is reasonable that the *obe1/2* and *obe3/4* mutants show more serious developmental defects than the *obe1/3* mutant.

2. In Figures 6 and 7, the authors show strong evidence that OBE-mediated H3K4me<sub>2/3</sub> activity is essential for the target selection of WRKY11. It would be more convincing if the authors also compared the H3K4me<sub>2/3</sub> regions (perhaps from published results), WRKY11 target sites, and OBE1 binding sites at the genomic level. This data could further support the proposed model.

Response: As suggested, we assessed the H3K4me<sub>3</sub> levels of WRKY11 and OBE1 target genes, indicating that both WRKY11 and OBE1 target genes showed a significantly higher level of H3K4me<sub>3</sub> than random genes (Appendix Fig S17A). Moreover, we determined the overlaps of H3K4me<sub>3</sub>-enriched genes, WRKY11 target genes and OBE1 target genes, and found that both WRKY11 and OBE1 target genes are significantly overlapped with H3K4me<sub>3</sub>-enriched genes (Appendix Fig S17B). These analyses support the notion that OBE-mediated recognition of H3K4me<sub>2/3</sub> is involved in the target selection of the WRKY-OBE complex. These results were added to the revised manuscript.

3. In Figure 8, the authors compare the drought survival phenotype of different *wrky* and *obe*



mutants. As mentioned above, the *obe* double mutant used in this figure is inconsistent with the one used in RNA-seq. Please also include *obe1/2* in the phenotypic and q-PCR assays. In addition, the drought-tolerant phenotype of *obe1/3* and *wrky-qm* is impressive, and please also perform the water loss assay to strengthen this piece of data.

Response: As indicated above, the failure in identifying the upregulation of stress-responsive genes in the *obe1/2* and *wrky-qm/15<sup>+/-</sup>* mutant is caused by the absence of well-developed roots and leaves in these mutants. Therefore, we used the *obe1/3* and *wrky-qm* mutants with weak developmental defects for analysis of drought stress tolerance. According to your suggestion, we performed the water loss assay in wild type, *obe1/3* and *wrky-qm*. The result indicated that the water loss rate was lower in the *obe1/3* and *wrky-qm* mutant compared with the wild type (Figure 8C), which is consistent with the increased drought-tolerance phenotype of these mutants.

4. The authors show two biological processes: 1) most OBEs and IId WRKYs show less expression in drought-treated plants, and OBEs/WRKYs can bind to the promoters of stress-induced genes (DREB1s), 2) stress-responsive genes are up-regulated in drought-treated plants, and then propose a model that OBE-WRKY complex balances plant growth and stress tolerance. However, it is not conclusive whether the expression of stress-responsive genes depends on the OBE-WRKY complex. I suggest an additional experiment to dissect this notion. The authors could perform a time-course (for example, 0, 3h, 6h, 12h, 24h, 48h) q-PCR assay of OBE, WRKY, DREB1, and RD29B, to see the time-dependent correlation between the decrease of OBE/WRKY expression and the increase of stress-responsive genes, which might further support the model.

Response: The expression levels of *WRKY* and *OBE* genes were reduced by long-term drought treatments (shown in this study) but not by short-term drought treatments (shown by online RNA-seq and microarray data in previous studies). Therefore, the Arabidopsis Col-0 plants were grown in soil under either well-watered or long-term drought-treated conditions (for 0, 5, 8, 11, 14, 17, or 20 days), and then the expression levels of *WRKY17* and *DREB1A* were determined by quantitative RT-PCR. The results indicated that the expression level of *WRKY17* was reduced by

the drought treatment in a time-dependent manner, whereas the expression of *DREB1A* was induced over time (Appendix Fig S18). In combination with the finding that the WRKY-OBE complex is involved in the transcriptional repression of *DREB1s*, our study supports the notion that the drought-induced transcription of stress-responsive genes is partially caused by the reduced expression of *WRKY* and *OBE* genes.

Minor issues:

1. In the last paragraph of the Introduction, the authors wrote, "the conserved N-terminal motif of the group IId WRKY proteins, which was previously thought to interact with calmodulin based on in vitro assays (Park et al., 2005), is responsible for interacting with the histone-binding OBE proteins but not with calmodulin in Arabidopsis plants". However, as no data showed that it does not interact with the calmodulin in this manuscript, the authors cannot exclude the possibility that this motif also interacts with calmodulin. Please modify.

Response: We agree with the reviewer that we cannot exclude the possibility that the conserved N-terminal motif of the group IId WRKY proteins also interacts with calmodulin even though we did not identify the interaction by AP-MS in this study. As suggested, we modified it in our revised manuscript.

In addition, the authors gave a new name, OID, to this motif. However, besides interacting with OBEs, this motif is also essential for WRKY-WRKY interaction (this study) and might interact with other proteins like calmodulin. I suggested the authors keep the coiled-coil domain rather than give a new name to it.

Response: According to the suggestion, we termed it the coiled-coil domain instead of the OBE-interaction domain in the revised manuscript.

2. Though the authors showed that OBEs interact with IId subgroup WRKYs, it is unclear whether the OBEs also interact with WRKYs in other subgroups. This data would help us understand the specificity of this OBE-WRKY complex.

Response: As suggested, we chose WRKY40, WRKY36, WRKY12 and WRKY14 as the representatives of IIa, IIb, IIc and IIe WRKY subgroups for OBE interaction analysis. As shown in our Y2H result (Appendix Fig S6), the OBEs interact with IId subgroup WRKYs but not with other subgroups of WRKYs, suggesting that the OBE proteins specifically form a complex with group IId WRKYs.

3. Figure 7E, the authors should also test the combination of OBE1+WRKY11, and OBE1+WRKY11-OIDΔ.

Response: As suggested, we test the OBE1+WRKY11 and OBE1+WRKY11-CCΔ combinations in Figure 7E. The result indicated that OBE1 markedly enhances WRKY11-mediated transcriptional repression, and showed that the effect of OBE1 on transcriptional repression is disrupted by the deletion of the coiled-coil domain in WRKY11, suggesting that the interaction of OBEs with WRKYs contributes to WRKYs-mediated transcriptional repression.

Dear Dr He,

We have now received re-review reports for the revised version of your manuscript from two of the three referees, which I have attached below. As you will see, you have addressed their concerns satisfactorily. I have looked through referee 1's comments on the revised version; I find your responses to them reasonable and comprehensive, and am happy to proceed towards publication (on the proviso that Referee 1 doesn't come back with over-riding technical concerns). I would, however, like you to check the new labelling of figure 1B - should one of these panels be labelled obe1? Please also consider accompanying figure 1A with a Western blot to illustrate the co-IP shown. This could be from one of your tagged lines, and may help the readers' orientate themselves in the paper.

In addition, before we can proceed to publication, there are some remaining editorial points which need to be addressed.

In this regard would you please:

- select five keywords,
- include a "Disclosure and competing interests statement",
- remove the author credit section from the manuscript,
- include callouts for panels of Appendix Figure S9 and Appendix Figure S15, remove the dataset legends from the manuscript file ,
- add page numbers to the table of contents in Appendix figure 1,
- upload Source Data for each figure and its panels separately as one zipped file per one figure; the SD for Appendix figures can all be zipped together in one file,
- Make all data generated for this manuscript and archived on third party databases publicly accessible,
- remove main figure legends from the individual figure files as they are provided in the main ms file; these should be placed after the References, and
- remove Appendix figure legends from the manuscript; we only need the main figure legends in the ms file

We include a synopsis of the paper (see <http://emboj.embopress.org/>). Please provide me with a general summary statement of two sentences and 3-5 bullet points that capture the key findings of the paper.

We also need a summary figure for the synopsis. The size should be 550 wide by [200-400] high (pixels). You can also use something from the figures if that is easier.

EMBO Press is an editorially independent publishing platform for the development of EMBO scientific publications.

Best wishes,

William Teale

William Teale, PhD  
Editor  
The EMBO Journal  
[w.teale@embojournal.org](mailto:w.teale@embojournal.org)

Instructions for preparing your revised manuscript:

Please check that the title and abstract of the manuscript are brief, yet explicit, even to non-specialists.

When assembling figures, please refer to our figure preparation guideline in order to ensure proper formatting and readability in print as well as on screen:

<https://bit.ly/EMBOPressFigurePreparationGuideline>

See also figure legend guidelines: <https://www.embopress.org/page/journal/14602075/authorguide#figureformat>

**IMPORTANT:** When you send the revision we will require

- a point-by-point response to the referees' comments, with a detailed description of the changes made (as a word file).
- a word file of the manuscript text.
- individual production quality figure files (one file per figure)
- a complete author checklist, which you can download from our author guidelines (<https://www.embopress.org/page/journal/14602075/authorguide>).
- Expanded View files (replacing Supplementary Information)

Please see out instructions to authors

<https://www.embopress.org/page/journal/14602075/authorguide#expandedview>

Please remember: Digital image enhancement is acceptable practice, as long as it accurately represents the original data and conforms to community standards. If a figure has been subjected to significant electronic manipulation, this must be noted in the figure legend or in the 'Materials and Methods' section. The editors reserve the right to request original versions of figures and the original images that were used to assemble the figure.

Further information is available in our Guide For Authors: <https://www.embopress.org/page/journal/14602075/authorguide>

We realize that it is difficult to revise to a specific deadline. In the interest of protecting the conceptual advance provided by the work, we recommend a revision within 3 months (3rd Oct 2023). Please discuss the revision progress ahead of this time with the editor if you require more time to complete the revisions. Use the link below to submit your revision:

<https://emboj.msubmit.net/cgi-bin/main.plex>

-----  
Referee #2:

The authors have adequately addressed my concerns in the revised manuscript.

Referee #3:

The authors did a great job to revise and manuscript and answer the reviewers' comments. I have no more concern on this revision.

All editorial and formatting issues were resolved by the authors.

Dear Xin-Jian,

I am pleased to inform you that your manuscript has been accepted for publication in the EMBO Journal.

Congratulations on a really impressive study!

-----

Please note that it is EMBO Journal policy for the transcript of the editorial process (containing referee reports and your response letter) to be published as an online supplement to each paper. If you do NOT want this, you will need to inform the Editorial Office via email immediately. More information is available here:

<https://www.embopress.org/page/journal/14602075/authorguide#transparentprocess>

Your manuscript will be processed for publication in the journal by EMBO Press. Manuscripts in the PDF and electronic editions of The EMBO Journal will be copy edited, and you will be provided with page proofs prior to publication. Please note that supplementary information is not included in the proofs.

You will be contacted by Wiley Author Services to complete licensing and payment information. The required 'Page Charges Authorization Form' is available here: [https://www.embopress.org/pb-assets/embo-site/tej\\_apc.pdf](https://www.embopress.org/pb-assets/embo-site/tej_apc.pdf) - please download and complete the form and return to [embopressproduction@wiley.com](mailto:embopressproduction@wiley.com)

EMBO Press participates in many Publish and Read agreements that allow authors to publish Open Access with reduced/no publication charges. Check your eligibility: <https://authorservices.wiley.com/author-resources/Journal-Authors/open-access/affiliation-policies-payments/index.html>

Should you be planning a Press Release on your article, please get in contact with [embojournal@wiley.com](mailto:embojournal@wiley.com) as early as possible, in order to coordinate publication and release dates.

If you have any questions, please do not hesitate to call or email the Editorial Office. Thank you for your contribution to The EMBO Journal.

Best wishes,

William

William Teale, PhD  
Editor  
The EMBO Journal  
[w.teale@embojournal.org](mailto:w.teale@embojournal.org)

\*\* Click here to be directed to your login page: <https://emboj.msubmit.net>

## EMBO Press Author Checklist

|                                        |
|----------------------------------------|
| Corresponding Author Name: Xinjian He  |
| Journal Submitted to: the EMBO Journal |
| Manuscript Number: EMBOJ-2023-113639   |

### USEFUL LINKS FOR COMPLETING THIS FORM

- [The EMBO Journal - Author Guidelines](#)
- [EMBO Reports - Author Guidelines](#)
- [Molecular Systems Biology - Author Guidelines](#)
- [EMBO Molecular Medicine - Author Guidelines](#)

### Reporting Checklist for Life Science Articles (updated January)

This checklist is adapted from Materials Design Analysis Reporting (MDAR) Checklist for Authors. MDAR establishes a minimum set of requirements in transparent reporting in the life sciences (see Statement of Task: [10.31222/osf.io/9sm4x](https://doi.org/10.31222/osf.io/9sm4x)). Please follow the journal's guidelines in preparing your article. **Please note that a copy of this checklist will be published alongside your article.**

#### Abridged guidelines for figures

##### 1. Data

The data shown in figures should satisfy the following conditions:

- the data were obtained and processed according to the field's best practice and are presented to reflect the results of the experiments in an accurate and unbiased manner.
- ideally, figure panels should include only measurements that are directly comparable to each other and obtained with the same assay.
- plots include clearly labeled error bars for independent experiments and sample sizes. Unless justified, error bars should not be shown for technical replicates.
- if  $n < 5$ , the individual data points from each experiment should be plotted. Any statistical test employed should be justified.
- Source Data should be included to report the data underlying figures according to the guidelines set out in the authorship guidelines on Data

##### 2. Captions

Each figure caption should contain the following information, for each panel where they are relevant:

- a specification of the experimental system investigated (eg cell line, species name).
- the assay(s) and method(s) used to carry out the reported observations and measurements.
- an explicit mention of the biological and chemical entity(ies) that are being measured.
- an explicit mention of the biological and chemical entity(ies) that are altered/varied/perturbed in a controlled manner.
- the exact sample size (n) for each experimental group/condition, given as a number, not a range;
- a description of the sample collection allowing the reader to understand whether the samples represent technical or biological replicates (including how many animals, litters, cultures, etc.).
- a statement of how many times the experiment shown was independently replicated in the laboratory.
- definitions of statistical methods and measures:
  - common tests, such as t-test (please specify whether paired vs. unpaired), simple  $\chi^2$  tests, Wilcoxon and Mann-Whitney tests, can be unambiguously identified by name only, but more complex techniques should be described in the methods section;
  - are tests one-sided or two-sided?
  - are there adjustments for multiple comparisons?
  - exact statistical test results, e.g., P values = x but not P values < x;
  - definition of 'center values' as median or average;
  - definition of error bars as s.d. or s.e.m.

**Please complete ALL of the questions below.  
Select "Not Applicable" only when the requested information is not relevant for your study.**

#### Materials

| <b>Newly Created Materials</b>                                                                                                                                                                                              | <b>Information included in the manuscript?</b> | <b>In which section is the information available?</b><br>(Reagents and Tools Table, Materials and Methods, Figures, Data Availability Section) |
|-----------------------------------------------------------------------------------------------------------------------------------------------------------------------------------------------------------------------------|------------------------------------------------|------------------------------------------------------------------------------------------------------------------------------------------------|
| New materials and reagents need to be available; do any restrictions apply?                                                                                                                                                 | Yes                                            | Materials and Methods                                                                                                                          |
| <b>Antibodies</b>                                                                                                                                                                                                           | <b>Information included in the manuscript?</b> | <b>In which section is the information available?</b><br>(Reagents and Tools Table, Materials and Methods, Figures, Data Availability Section) |
| For <b>antibodies</b> provide the following information:<br>- Commercial antibodies: RRID (if possible) or supplier name, catalogue number and or/clone number<br>- Non-commercial: RRID or citation                        | Yes                                            | Materials and Methods                                                                                                                          |
| <b>DNA and RNA sequences</b>                                                                                                                                                                                                | <b>Information included in the manuscript?</b> | <b>In which section is the information available?</b><br>(Reagents and Tools Table, Materials and Methods, Figures, Data Availability Section) |
| <b>Short novel DNA or RNA including primers, probes:</b> provide the sequences.                                                                                                                                             | Not Applicable                                 |                                                                                                                                                |
| <b>Cell materials</b>                                                                                                                                                                                                       | <b>Information included in the manuscript?</b> | <b>In which section is the information available?</b><br>(Reagents and Tools Table, Materials and Methods, Figures, Data Availability Section) |
| <b>Cell lines:</b> Provide species information, strain. Provide accession number in repository <b>OR</b> supplier name, catalog number, clone number, and <b>OR</b> RRID.                                                   | Not Applicable                                 |                                                                                                                                                |
| <b>Primary cultures:</b> Provide species, strain, sex of origin, genetic modification status.                                                                                                                               | Not Applicable                                 |                                                                                                                                                |
| Report if the cell lines were recently <b>authenticated</b> (e.g., by STR profiling) and tested for mycoplasma contamination.                                                                                               | Not Applicable                                 |                                                                                                                                                |
| <b>Experimental animals</b>                                                                                                                                                                                                 | <b>Information included in the manuscript?</b> | <b>In which section is the information available?</b><br>(Reagents and Tools Table, Materials and Methods, Figures, Data Availability Section) |
| <b>Laboratory animals or Model organisms:</b> Provide species, strain, sex, age, genetic modification status. Provide accession number in repository <b>OR</b> supplier name, catalog number, clone number, <b>OR</b> RRID. | Not Applicable                                 |                                                                                                                                                |
| <b>Animal observed in or captured from the field:</b> Provide species, sex, and age where possible.                                                                                                                         | Not Applicable                                 |                                                                                                                                                |
| Please detail <b>housing and husbandry conditions</b> .                                                                                                                                                                     | Not Applicable                                 |                                                                                                                                                |
| <b>Plants and microbes</b>                                                                                                                                                                                                  | <b>Information included in the manuscript?</b> | <b>In which section is the information available?</b><br>(Reagents and Tools Table, Materials and Methods, Figures, Data Availability Section) |
| <b>Plants:</b> provide species and strain, ecotype and cultivar where relevant, unique accession number if available, and source (including location for collected wild specimens).                                         | Yes                                            | Materials and Methods                                                                                                                          |
| <b>Microbes:</b> provide species and strain, unique accession number if available, and source.                                                                                                                              | Not Applicable                                 |                                                                                                                                                |
| <b>Human research participants</b>                                                                                                                                                                                          | <b>Information included in the manuscript?</b> | <b>In which section is the information available?</b><br>(Reagents and Tools Table, Materials and Methods, Figures, Data Availability Section) |
| If collected and within the bounds of privacy constraints report on age, sex and gender or ethnicity for all study participants.                                                                                            | Not Applicable                                 |                                                                                                                                                |
| <b>Core facilities</b>                                                                                                                                                                                                      | <b>Information included in the manuscript?</b> | <b>In which section is the information available?</b><br>(Reagents and Tools Table, Materials and Methods, Figures, Data Availability Section) |
| If your work benefited from core facilities, was their service mentioned in the acknowledgments section?                                                                                                                    | Not Applicable                                 |                                                                                                                                                |

#### Design



| <b>Study protocol</b>                                                                                                                                                    | <b>Information included in the manuscript?</b> | <b>In which section is the information available?</b><br>(Reagents and Tools Table, Materials and Methods, Figures, Data Availability Section) |
|--------------------------------------------------------------------------------------------------------------------------------------------------------------------------|------------------------------------------------|------------------------------------------------------------------------------------------------------------------------------------------------|
| If study protocol has been <b>pre-registered</b> , provide DOI in the <b>manuscript</b> . For clinical trials, provide the trial registration number <b>OR</b> cite DOI. | Not Applicable                                 |                                                                                                                                                |
| Report the <b>clinical trial registration number</b> (at ClinicalTrials.gov or equivalent), where applicable.                                                            | Not Applicable                                 |                                                                                                                                                |

| <b>Laboratory protocol</b>                                                                              | <b>Information included in the manuscript?</b> | <b>In which section is the information available?</b><br>(Reagents and Tools Table, Materials and Methods, Figures, Data Availability Section) |
|---------------------------------------------------------------------------------------------------------|------------------------------------------------|------------------------------------------------------------------------------------------------------------------------------------------------|
| Provide DOI OR other citation details if <b>external detailed step-by-step protocols</b> are available. | Not Applicable                                 |                                                                                                                                                |

| <b>Experimental study design and statistics</b>                                                                                                                                                                                                                                                                                            | <b>Information included in the manuscript?</b> | <b>In which section is the information available?</b><br>(Reagents and Tools Table, Materials and Methods, Figures, Data Availability Section) |
|--------------------------------------------------------------------------------------------------------------------------------------------------------------------------------------------------------------------------------------------------------------------------------------------------------------------------------------------|------------------------------------------------|------------------------------------------------------------------------------------------------------------------------------------------------|
| Include a statement about <b>sample size</b> estimate even if no statistical methods were used.                                                                                                                                                                                                                                            | Yes                                            | Figure legends                                                                                                                                 |
| Were any steps taken to minimize the effects of subjective bias when allocating animals/samples to treatment (e.g. <b>randomization procedure</b> )? If yes, have they been described?                                                                                                                                                     | Not Applicable                                 |                                                                                                                                                |
| Include a statement about <b>blinding</b> even if no blinding was done.                                                                                                                                                                                                                                                                    | Not Applicable                                 |                                                                                                                                                |
| Describe <b>inclusion/exclusion criteria</b> if samples or animals were excluded from the analysis. Were the criteria pre-established?                                                                                                                                                                                                     | Not Applicable                                 |                                                                                                                                                |
| If sample or data points were omitted from analysis, report if this was due to <b>attrition or intentional exclusion</b> and provide justification.                                                                                                                                                                                        |                                                |                                                                                                                                                |
| For every figure, are <b>statistical tests</b> justified as appropriate? Do the data meet the assumptions of the tests (e.g., normal distribution)? Describe any methods used to assess it. Is there an estimate of variation within each group of data? Is the variance similar between the groups that are being statistically compared? | Yes                                            | Figure legends                                                                                                                                 |

| <b>Sample definition and in-laboratory replication</b>                                           | <b>Information included in the manuscript?</b> | <b>In which section is the information available?</b><br>(Reagents and Tools Table, Materials and Methods, Figures, Data Availability Section) |
|--------------------------------------------------------------------------------------------------|------------------------------------------------|------------------------------------------------------------------------------------------------------------------------------------------------|
| In the figure legends: state number of times the experiment was <b>replicated</b> in laboratory. | Yes                                            | Figure legends                                                                                                                                 |
| In the figure legends: define whether data describe <b>technical or biological replicates</b> .  | Yes                                            | Figure legends                                                                                                                                 |

#### Ethics

| <b>Ethics</b>                                                                                                                                                                                                                                                                                            | <b>Information included in the manuscript?</b> | <b>In which section is the information available?</b><br>(Reagents and Tools Table, Materials and Methods, Figures, Data Availability Section) |
|----------------------------------------------------------------------------------------------------------------------------------------------------------------------------------------------------------------------------------------------------------------------------------------------------------|------------------------------------------------|------------------------------------------------------------------------------------------------------------------------------------------------|
| Studies involving <b>human participants</b> : State details of <b>authority granting ethics approval</b> (IRB or equivalent committee(s), provide reference number for approval).                                                                                                                        | Not Applicable                                 |                                                                                                                                                |
| Studies involving <b>human participants</b> : Include a statement confirming that <b>informed consent</b> was obtained from all subjects and that the experiments conformed to the principles set out in the WMA Declaration of Helsinki and the Department of Health and Human Services Belmont Report. | Not Applicable                                 |                                                                                                                                                |
| Studies involving <b>human participants</b> : For publication of <b>patient photos</b> , include a statement confirming that consent to publish was obtained.                                                                                                                                            | Not Applicable                                 |                                                                                                                                                |
| Studies involving experimental <b>animals</b> : State details of <b>authority granting ethics approval</b> (IRB or equivalent committee(s), provide reference number for approval. Include a statement of compliance with ethical regulations.                                                           | Not Applicable                                 |                                                                                                                                                |
| Studies involving <b>specimen and field samples</b> : State if relevant <b>permits</b> obtained, provide details of authority approving study; if none were required, explain why.                                                                                                                       | Not Applicable                                 |                                                                                                                                                |

| <b>Dual Use Research of Concern (DURC)</b>                                                                                                                                                                                                            | <b>Information included in the manuscript?</b> | <b>In which section is the information available?</b><br>(Reagents and Tools Table, Materials and Methods, Figures, Data Availability Section) |
|-------------------------------------------------------------------------------------------------------------------------------------------------------------------------------------------------------------------------------------------------------|------------------------------------------------|------------------------------------------------------------------------------------------------------------------------------------------------|
| Could your study fall under dual use research restrictions? Please check biosecurity documents and list of <b>select agents and toxins</b> (CDC): <a href="https://www.selectagents.gov/sat/list.htm">https://www.selectagents.gov/sat/list.htm</a> . | Not Applicable                                 |                                                                                                                                                |
| If you used a select agent, is the security level of the lab appropriate and reported in the manuscript?                                                                                                                                              | Not Applicable                                 |                                                                                                                                                |
| If a study is subject to dual use research of concern regulations, is the name of the <b>authority granting approval and reference number</b> for the regulatory approval provided in the manuscript?                                                 | Not Applicable                                 |                                                                                                                                                |

#### Reporting

The MDAR framework recommends adoption of discipline-specific guidelines, established and endorsed through community initiatives. Journals have their own policy about requiring specific guidelines and recommendations to complement MDAR.

| <b>Adherence to community standards</b>                                                                                                                                                                                                                                                                                              | <b>Information included in the manuscript?</b> | <b>In which section is the information available?</b><br>(Reagents and Tools Table, Materials and Methods, Figures, Data Availability Section) |
|--------------------------------------------------------------------------------------------------------------------------------------------------------------------------------------------------------------------------------------------------------------------------------------------------------------------------------------|------------------------------------------------|------------------------------------------------------------------------------------------------------------------------------------------------|
| State if relevant guidelines or checklists (e.g., <b>ICMJE, MIBBI, ARRIVE, PRISMA</b> ) have been followed or provided.                                                                                                                                                                                                              | Not Applicable                                 |                                                                                                                                                |
| For <b>tumor marker prognostic studies</b> , we recommend that you follow the <b>REMARK</b> reporting guidelines (see link list at top right). See author guidelines, under 'Reporting Guidelines'. Please confirm you have followed these guidelines.                                                                               | Not Applicable                                 |                                                                                                                                                |
| For <b>phase II and III randomized controlled trials</b> , please refer to the <b>CONSORT</b> flow diagram (see link list at top right) and submit the <b>CONSORT</b> checklist (see link list at top right) with your submission. See author guidelines, under 'Reporting Guidelines'. Please confirm you have submitted this list. | Not Applicable                                 |                                                                                                                                                |

#### Data Availability

| <b>Data availability</b>                                                                                                                                                                          | <b>Information included in the manuscript?</b> | <b>In which section is the information available?</b><br>(Reagents and Tools Table, Materials and Methods, Figures, Data Availability Section) |
|---------------------------------------------------------------------------------------------------------------------------------------------------------------------------------------------------|------------------------------------------------|------------------------------------------------------------------------------------------------------------------------------------------------|
| Have <b>primary datasets</b> been deposited according to the journal's guidelines (see 'Data Deposition' section) and the respective accession numbers provided in the Data Availability Section? | Yes                                            | RNA-seq and ChIP-seq data are deposited to Gene Expression Omnibus (GEO) database. Mass spectrometry data are provided in Appendix tables.     |
| Were <b>human clinical and genomic datasets</b> deposited in a public access-controlled repository in accordance to ethical obligations to the patients and to the applicable consent agreement?  | Not Applicable                                 |                                                                                                                                                |
| Are <b>computational models</b> that are central and integral to a study available without restrictions in a machine-readable form? Were the relevant accession numbers or links provided?        | Not Applicable                                 |                                                                                                                                                |
| If publicly available data were reused, provide the respective <b>data citations in the reference list</b> .                                                                                      | Yes                                            | Reference                                                                                                                                      |
